# Supplementary material for: Oxido- and Dioxido-Vanadium(V) Complexes Supported on Carbon Materials: Reusable Catalysts for the Oxidation of Cyclohexane
Source: MDPI journal article supplement (doi:10.3390/nano11061456), 2021-05-31
Supplement: s1 [file s1]

## Supplementary Information

### Oxido- and dioxido-vanadium(V) complexes supported on carbon materials: reusable catalysts for the oxidation of cyclohexane

Manas Sutradhar<sup>1,\*</sup>, Marta A. Andrade<sup>1</sup>, Sónia A. C. Carabineiro<sup>1,2,3,\*</sup>, Luísa M. D. R. S. Martins<sup>1,\*</sup>, M. Fátima C. Guedes da Silva<sup>1</sup> and Armando J. L. Pombeiro<sup>1,4</sup>

<sup>1</sup> Centro de Química Estrutural, Instituto Superior Técnico, Universidade de Lisboa, Av. Rovisco Pais, 1049-001 Lisboa, Portugal.

<sup>2</sup> Laboratory of Catalysis and Materials (LCM), Associate Laboratory LSRE-LCM, Faculty of Engineering, University of Porto, 4200-465 Porto, Portugal

<sup>3</sup> LAQV-REQUIMTE, Departamento de Química, Faculdade de Ciências e Tecnologia, Universidade NOVA de Lisboa, Largo da Torre, 2829-516 Caparica, Portugal.

<sup>4</sup> Peoples' Friendship University of Russia (RUDN University), Research Institute of Chemistry, 6 Miklukho-Maklaya Street, Moscow 117198, Russian Federation

\* Correspondence: manas@tecnico.ulisboa.pt (M.S.), sonia.carabineiro@fct.unl.pt (S.A.C.C.), luisammartins@tecnico.ulisboa.pt (L.M.D.R.S.)

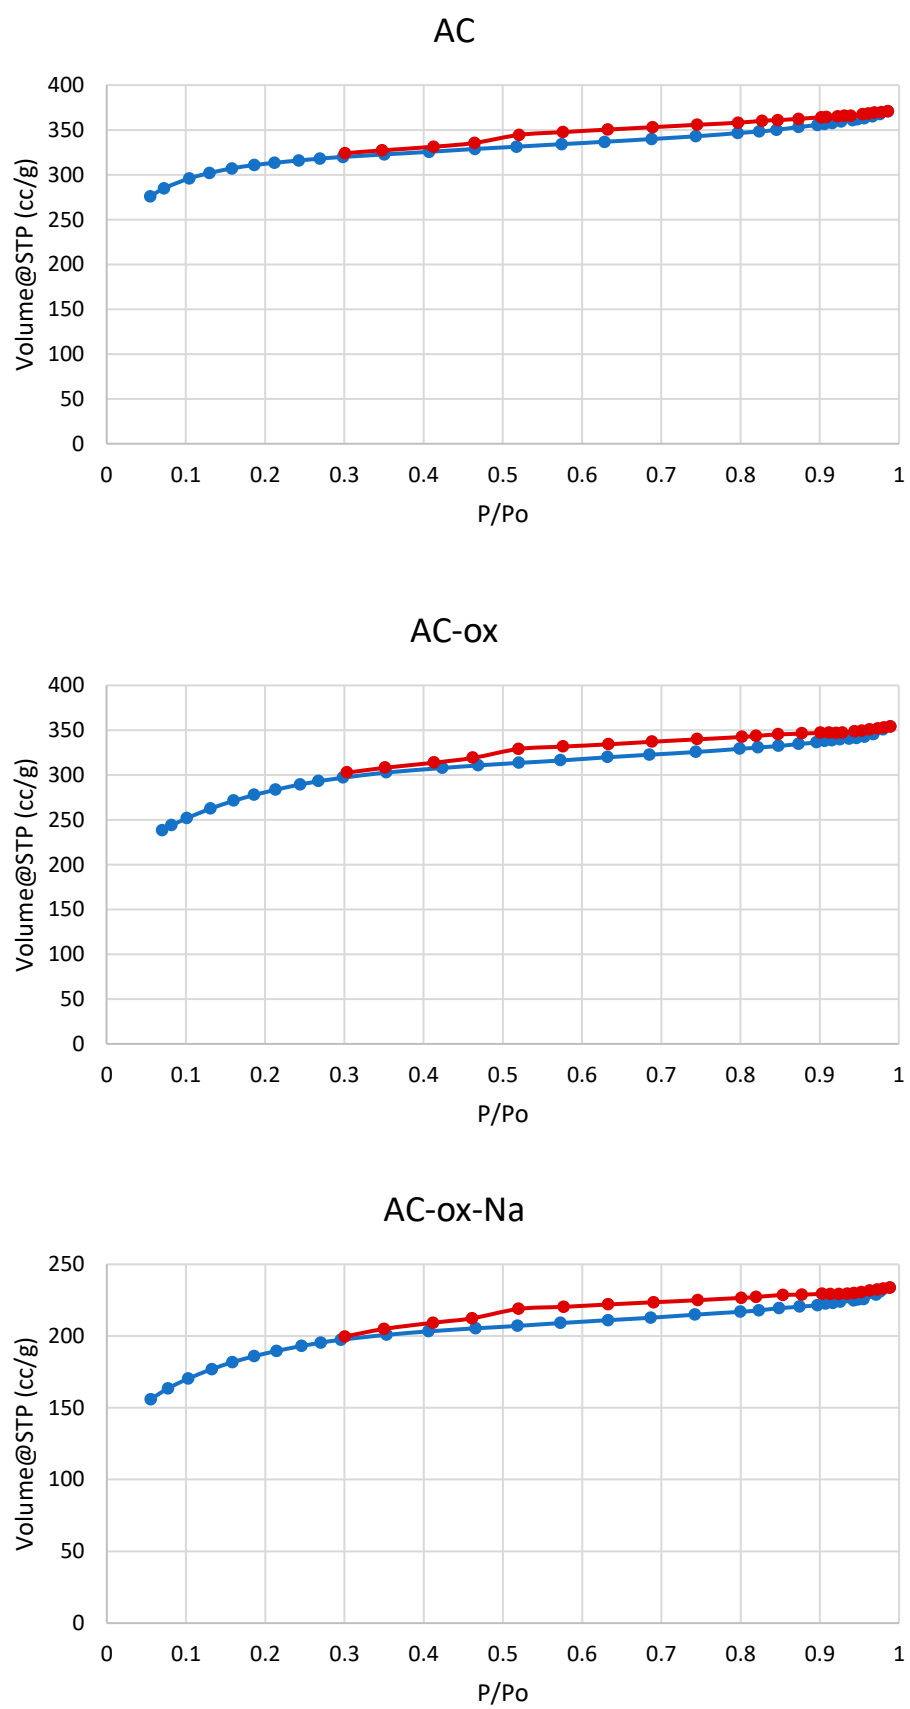

**Figure S1.** N<sub>2</sub> adsorption isotherms of AC, AC-ox, AC-ox-Na.

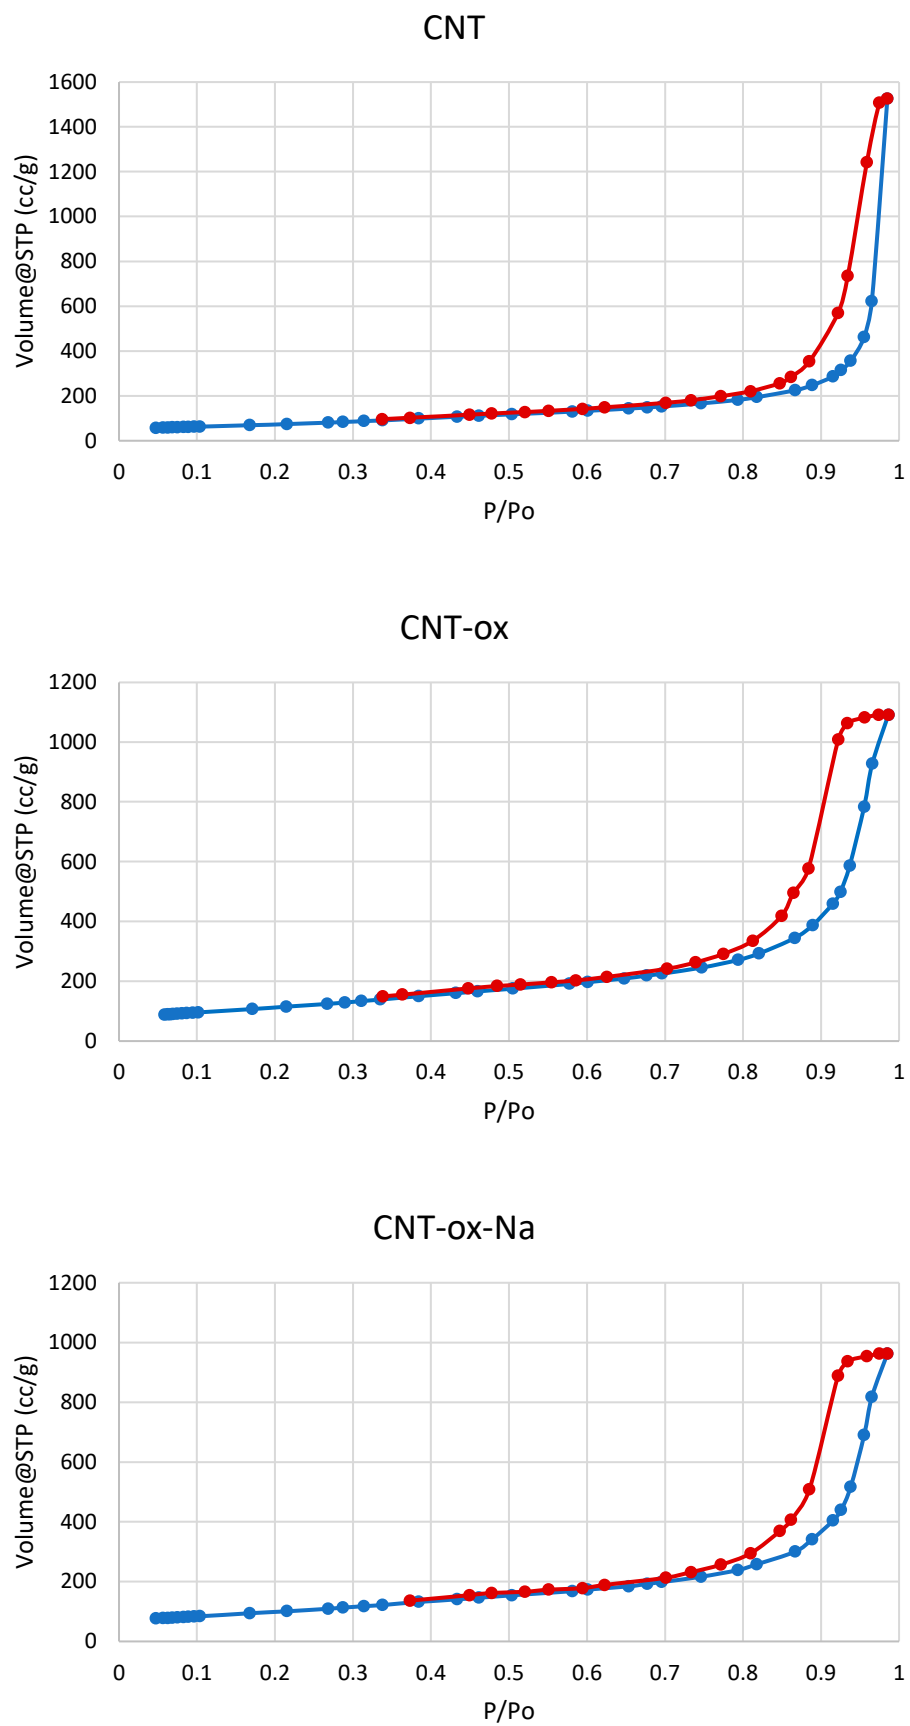

**Figure S2.** N<sub>2</sub> adsorption isotherms of CNT, CNT-ox, CNT-ox-Na.

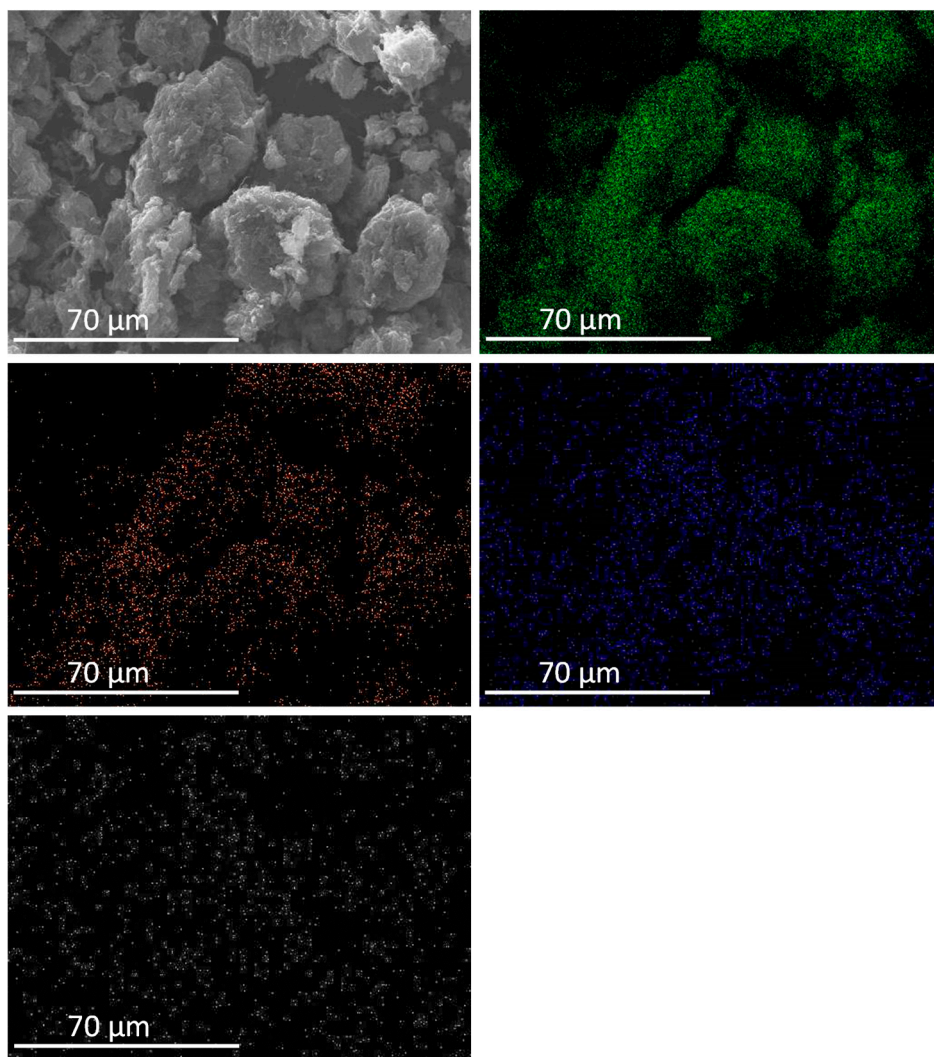

**Figure S3.** SEM-EDX mapping for sample V1@CNT-ox: C (green), O (pink), Br (blue) and V (white).

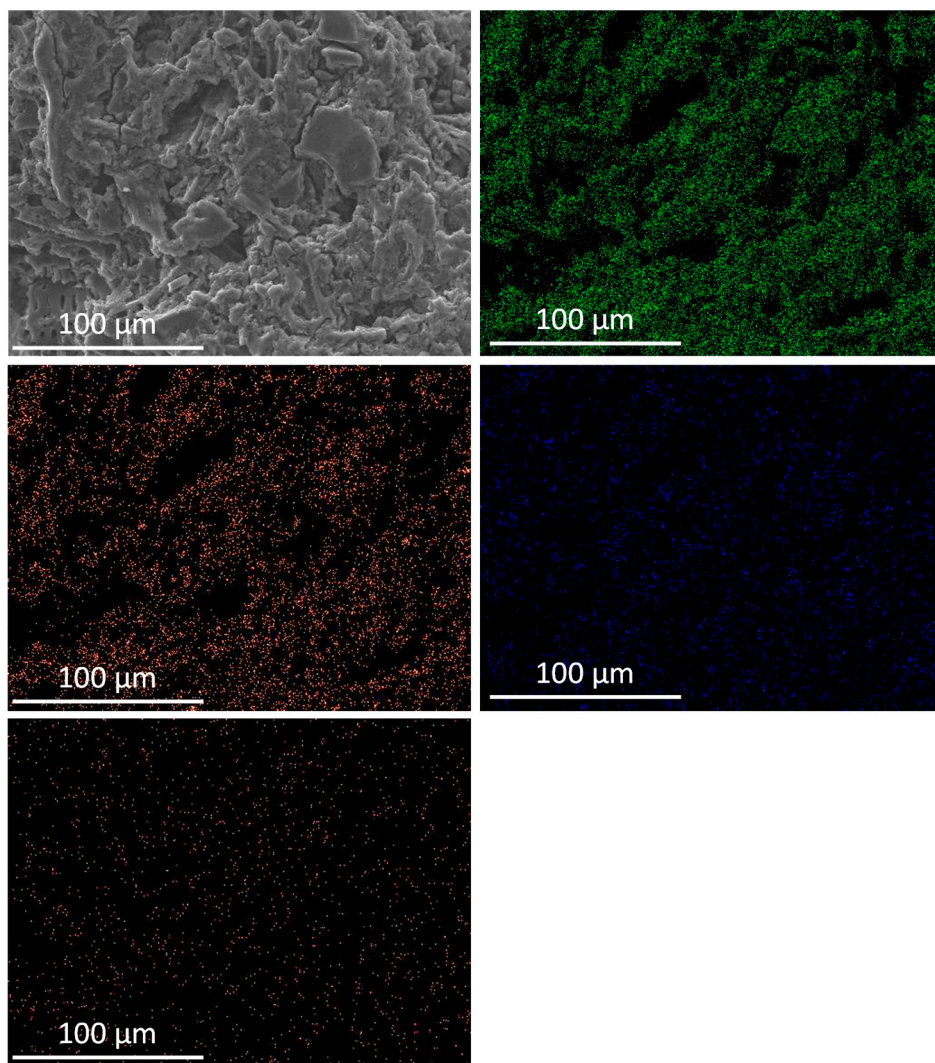

**Figure S4.** EDX mapping for sample **V2@AC-ox**: C (green), O (pink), Br (blue) and V (white).

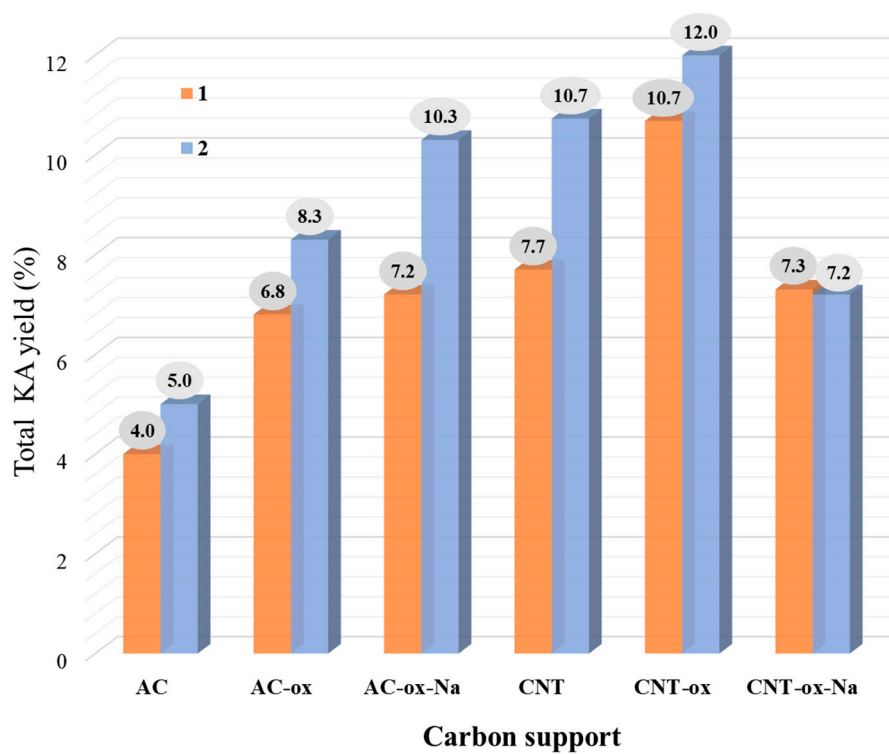

**Figure S5.** Total yield of KA oil obtained by the MW-assisted oxidation of cyclohexane at 80 °C, 20 W, for 2 h, supported on different carbon materials.

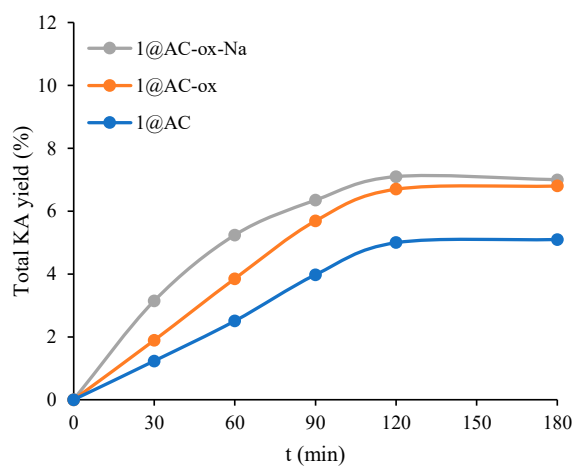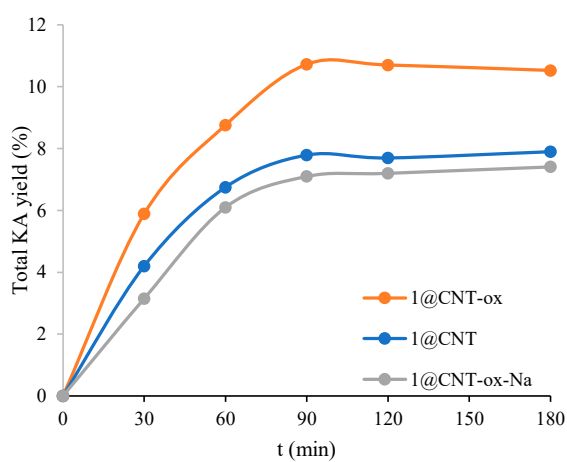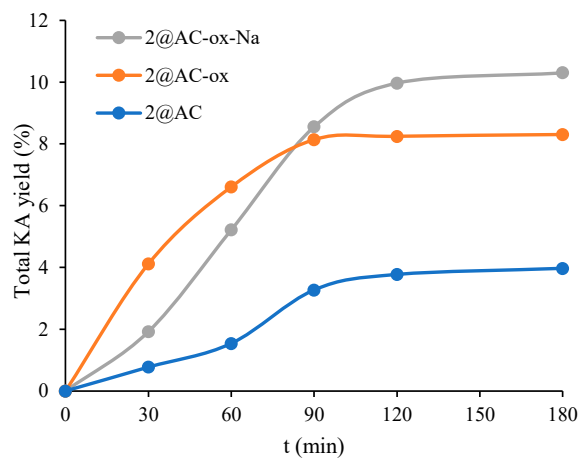

**Figure S6.** Effect of the duration of the MW irradiation on the catalytic activity of supported oxidovanadium complexes for the oxidation of cyclohexane with TBHP in MeCN.

**Table S1.** Summary of uses of carbon-supported oxidovanadium complexes in various catalytic reactions and major outcomes.

| Reaction                          | Vanadium complexes                                  | Carbon support                                                        | Catalytic results                                                                    | Catalyst stability                                                                                                              | Ref  |
|-----------------------------------|-----------------------------------------------------|-----------------------------------------------------------------------|--------------------------------------------------------------------------------------|---------------------------------------------------------------------------------------------------------------------------------|------|
| 1-phenylethanol oxidation         | Oxovanadium (V)                                     | Functionalized MWCNT, AC and CX                                       | 96 % acetophenone yield, > 98% selectivity                                           | 90 % of the catalytic activity was observed by the 10th cycle.                                                                  | [1]  |
| Oxidation of alcohols             | Oxovanadium Schiff base                             | Graphene nanosheets                                                   | 96 % of benzohydrazone                                                               | Efficient recycling of the catalyst over six runs.                                                                              | [2]  |
| Cyclooctene oxidation             | Hydroxyl functionalized oxovanadium(IV) Schiff-base | Modified MWCNT                                                        | Cyclooctene epoxide (08.6%), cyclooctene-1-ol (52.5%) and cyclooctene-1-one (28.9%). | Reused for three times without neither loss of activity or selectivity.                                                         | [3]  |
| Styrene oxidation                 | Oxovanadium(IV) acetylacetonate                     | Amino-modified CMK-3                                                  | 66.7 % yield of styrene oxide with a selectivity of 70.5 %                           | A decrease of 10 % in conversion and < 10 % selectivity to styrene oxide were reported.                                         | [4]  |
| Styrene epoxidation               | Oxovanadium(IV) salen                               | Amino-modified graphene oxide                                         | 18.5 % styrene epoxide, and 21% selectivity                                          | Three recycling runs for the catalyst with a 10 % conversion drop and slight selectivity decrease (< 5%).                       | [5]  |
|                                   | Oxovanadium(IV) salen                               | Carbon-coated Fe <sub>3</sub> O <sub>4</sub> hybridized with graphene | 54.6 % yield of styrene epoxide with 59.2% selectivity                               | For two cycles, almost no leaching was observed; both yields and selectivity were maintained.                                   | [6]  |
|                                   | Oxovanadium(II) Schiff base                         | Amino-functionalized graphene oxide                                   | 16.7 % yield of styrene epoxide with 20.7 % selectivity                              | No significant loss of activity and selectivity after successive runs (<5 %).                                                   | [7]  |
| Epoxidation of oleic acid         | Oxovanadium Schiff base                             | Functionalized graphene oxide                                         | 98.9 yield of the epoxide with 99.1 % selectivity                                    | The catalysts could be successfully recycled and reused for six runs without a significant decrease in activity or selectivity. | [8]  |
| Epoxidation of geraniol           | Oxovanadium(IV) acetylacetonate                     | CMK-3                                                                 | Conversions > 98% and 98-99% selectivity for 2,3-epoxygeraniol                       | For two cycles, almost no leaching was observed; both yields and selectivity were maintained.                                   | [9]  |
| Oxidation of p-chlorobenzenethiol | Oxovanadium (IV) complex                            | Amino functional microporous organic nanotube frameworks              | 100 % conversion was reported with 98 % selectivity.                                 | The material was recycled more than 8 times with no apparent decrease in catalytic activity                                     | [10] |



**Table S2.** Supported vanadium complexes in cyclohexane oxidation and major outcomes.

| Vanadium complexes                           | Support                                   | Yield (%) |      |      | Selectivity to KA oil (%) | Catalyst stability                                                          | Ref       |
|----------------------------------------------|-------------------------------------------|-----------|------|------|---------------------------|-----------------------------------------------------------------------------|-----------|
|                                              |                                           | A         | K    | O    |                           |                                                                             |           |
| Oxidovanadium(V)                             | Functionalized AC and CNT                 | 7.0       | 5.0  | -    | ~100                      | Activity drop of 28 % by the 4 <sup>th</sup> cycle.                         | This work |
| Functionalised oxidovanadium(IV) Schiff-base | Modified MWCNTs                           | 62.5      | 8.9  | 7.5  | 90.5                      | No leaching was observed.                                                   | [11]      |
| Oxidovanadium(IV)                            | PDMS                                      | 4.7       | 1.0  | -    | ~100                      | The activity of the recycled catalyst was much lower.                       | [12]      |
| V-scorpionate complex                        | MOR zeolite                               | 7.9       | 43.9 | -    | ~100                      | Loss of activity in the recycling tests: 18 % in the 4 <sup>th</sup> cycle. | [13]      |
| Vanadium phosphate                           | Mesoporous KIT-6 silica                   | 4.9       | 8.6  | 5.8  | 69.9                      | A conversion decrease of 30 % was observed by the 5 <sup>th</sup> cycle.    | [14]      |
| VO <sub>2</sub>                              | HTS (TiO <sub>2</sub> -modified material) | 0.1       | 2.7  | 13.4 | 21.7                      | -                                                                           | [15]      |
| Vanadium phosphorus oxide (VPO)              | SBA-15 and TUD-1 silicas                  | 1.0       | 30.0 | -    | ~100                      | -                                                                           | [16]      |

A- cyclohexanol; K- cyclohexanone; O- others; AC-activated carbon; CNT- carbon nanotubes.

## References

1. Sutradhar, M.; Martins, L.M.D.R.S.; Carabineiro, S.A.C.; Guedes da Silva, M.F.C.; Buijnsters, J.G.; Figueiredo, J.L.; Pombeiro, A.J.L. Oxidovanadium(V) Complexes Anchored on Carbon Materials as Catalysts for the Oxidation of 1-Phenylethanol. *ChemCatChem* **2016**, *8*, 2254–2266, doi:10.1002/cctc.201600316.
2. Mungse, H.P.; Verma, S.; Kumar, N.; Sain, B.; Khatri, O.P. Grafting of oxo-vanadium Schiff base on graphene nanosheets and its catalytic activity for the oxidation of alcohols. *J. Mater. Chem.* **2012**, *22*, 5427–5433, doi:10.1039/c2jm15644j.
3. Salavati-Niasari, M.; Badiei, A.; Saberyan, K. Oxovanadium(IV) salophen complex covalently anchored to multi-wall carbon nanotubes (MWNTs) as heterogeneous catalyst for oxidation of cyclooctene. *Chem. Eng. J.* **2011**, *173*, 651–658, doi:10.1016/j.cej.2011.07.023.
4. Wang, X.; Wu, S.; Li, Z.; Yang, X.; Hu, J.; Huo, Q.; Guan, J.; Kan, Q. Oxovanadium(IV), copper(II) or cobalt(II) acetylacetonate complexes immobilized on amino-functionalized CMK-3 for the aerobic epoxidation of styrene. *Appl. Organomet. Chem.* **2015**, *29*, 698–706, doi:10.1002/aoc.3353.
5. Su, H.; Wu, S.; Li, Z.; Huo, Q.; Guan, J.; Kan, Q. Co(II), Fe(III) or VO(II) Schiff base metal complexes immobilized on graphene oxide for styrene epoxidation. *Appl. Organomet. Chem.* **2015**, *29*, 462–467, doi:10.1002/aoc.3316.
6. Li, Z.; Wu, S.; Zheng, D.; Ding, H.; Wang, X.; Yang, X.; Huo, Q.; Guan, J.; Kan, Q. Enhanced aerobic epoxidation of styrene with copper(II), cobalt(II), iron(III), or

oxovanadium(IV) salen complexes immobilized onto carbon-coated Fe<sub>3</sub>O<sub>4</sub> nanoparticles hybridized with graphene sheets. *Chempluschem* **2014**, 79, 716–724, doi:10.1002/cplu.201300424.

7. Li, Z.; Wu, S.; Ding, H.; Lu, H.; Liu, J.; Huo, Q.; Guan, J.; Kan, Q. Oxovanadium(iv) and iron(iii) salen complexes immobilized on amino-functionalized graphene oxide for the aerobic epoxidation of styrene. *New J. Chem.* **2013**, 37, 4220–4229, doi:10.1039/c3nj00982c.
8. Verma, S.; Aila, M.; Kaul, S.; Jain, S.L. Immobilized oxo-vanadium Schiff base on graphene oxide as an efficient and recyclable catalyst for the epoxidation of fatty acids and esters. *RSC Adv.* **2014**, 4, 30598–30604, doi:10.1039/c4ra03454f.
9. Dorbes, S.; Pereira, C.; Andrade, M.; Barros, D.; Pereira, A.M.; Rebelo, S.L.H.; Araújo, J.P.; Pires, J.; Carvalho, A.P.; Freire, C. Oxidovanadium(IV) acetylacetonate immobilized onto CMK-3 for heterogeneous epoxidation of geraniol. *Microporous Mesoporous Mater.* **2012**, 160, 67–74, doi:10.1016/j.micromeso.2012.03.041.
10. Zhang, H.; Zhou, M.; Xiong, L.; He, Z.; Wang, T.; Xu, Y.; Huang, K. Oxo-vanadium (IV) complex supported by microporous organic nanotube frameworks: A high selective heterogeneous catalyst for the oxidation of thiols to disulfides. *Microporous Mesoporous Mater.* **2018**, 255, 103–109, doi:10.1016/j.micromeso.2017.07.041.
11. Salavati-Niasari, M.; Bazarganipour, M. Synthesis, characterization and liquid phase oxidation of cyclohexane with hydrogen peroxide over oxovanadium(IV) Schiff-base tetradendate complex covalently anchored to multi-wall carbon nanotubes (MWNTs). *Bull. Korean Chem. Soc.* **2009**, 30, 355–362, doi:10.5012/bkcs.2009.30.2.355.
12. Silva, T.F.S.; Leod, T.C.O.M.; Martins, L.M.D.R.S.; Guedes Da Silva, M.F.C.; Schiavon, M.A.; Pombeiro, A.J.L. Pyrazole or tris(pyrazolyl)ethanol oxo-vanadium(IV) complexes as homogeneous or supported catalysts for oxidation of cyclohexane under mild conditions. *J. Mol. Catal. A Chem.* **2013**, 367, 52–60, doi:10.1016/j.molcata.2012.10.024.
13. Ottaviani, D.; Van-Dúnem, V.; Carvalho, A.P.; Martins, A.; Martins, L.M.D.R.S. Eco-friendly cyclohexane oxidation by a V-scorpionate complex immobilized at hierarchical MOR zeolite. *Catal. Today* **2019**, 1–8, doi:10.1016/j.cattod.2019.09.034.
14. Rezaei, M.; Najafi Chermahini, A.; Dabbagh, H.A. Green and selective oxidation of cyclohexane over vanadium pyrophosphate supported on mesoporous KIT-6. *Chem. Eng. J.* **2017**, 314, 515–525, doi:10.1016/j.cej.2016.12.009.
15. Zhong, W.; Qiao, T.; Dai, J.; Mao, L.; Xu, Q.; Zou, G.; Liu, X.; Yin, D.; Zhao, F. Visible-light-responsive sulfated vanadium-doped TS-1 with hollow structure: Enhanced photocatalytic activity in selective oxidation of cyclohexane. *J. Catal.* **2015**, 330, 208–221, doi:10.1016/j.jcat.2015.06.013.
16. Santra, C.; Shah, S.; Mondal, A.; Pandey, J.K.; Panda, A.B.; Maity, S.; Chowdhury, B. Synthesis, characterization of VPO catalyst dispersed on mesoporous silica surface and catalytic activity for cyclohexane oxidation reaction. *Microporous Mesoporous Mater.* **2016**, 223, 121–128, doi:10.1016/j.micromeso.2015.10.046.
